# Supplementary material for: Chiral 0D hybrid lead-bromide perovskites with strong nonlinear chiroptical properties
Source: Royal Society of Chemistry journal article supplement (doi:10.1039/d4qm00627e), 2024-11-15
Supplement: d4qm00627e1.pdf [file d4qm00627e1.pdf]

## Supporting Information

### **Chiral 0D hybrid lead-bromide perovskite with strong nonlinear chiroptical properties**

Huan Yang,<sup>[a]</sup> Bing Sun,\*<sup>[a]</sup> Junjie Guan,<sup>[b]</sup> Shun-Da Wu,<sup>[a]</sup> Peihan Wang,<sup>[b]</sup> Qiang Wang,<sup>[a]</sup> Jialiang Xu\*<sup>[b]</sup> and Hao-Li Zhang\*<sup>[a]</sup>

<sup>[a]</sup> State Key Laboratory of Applied Organic Chemistry (SKLAOC), Key Laboratory of Special Function Materials and Structure Design (MOE), College of Chemistry and Chemical Engineering, Lanzhou University, Lanzhou 730000, P. R. China.

<sup>[b]</sup> School of Materials Science and Engineering, Smart Sensing Interdisciplinary Science Center, Frontiers Science Center for New Organic Matter, Nankai University, 300350 Tianjin, P. R. China.

Email: bingsun@lzu.edu.cn; jialiang.xu@nankai.edu.cn; haoli.zhang@lzu.edu.cn

## 1. Experimental Section

### 2. Characterization

**Figure S1.** Experimental and calculated PXRD patterns.

**Figure S2.** PXRD patterns of the as-prepared and exposed in the air.

**Figure S3.** TGA data.

**Figure S4.** Hydrogen bonding interactions of (*R*-APD)PbBr<sub>4</sub>.

**Figure S5.** Inorganic chain and crystal structures of (*R*-/*S*-APD)PbBr<sub>4</sub>.

**Figure S6.** The asymmetry unit of (1*R*,2*R*-/1*S*,2*S*-DACH)<sub>2</sub>PbBr<sub>6</sub>·2H<sub>2</sub>O.

**Figure S7.** Hydrogen bonding interactions of (1*R*,2*R*-DACH)<sub>2</sub>PbBr<sub>6</sub>·2H<sub>2</sub>O.

**Figure S8.** The structure of distorted octahedral.

**Figure S9.** The Tauc plots.

**Figure S10.** CD spectra of *R*/*S*-APD·2HCl and 1*R*,2*R*-/1*S*,2*S*-DACH·2HCl.

**Figure S11.** The *g*<sub>CD</sub> spectra.

**Figure S12.** Calculated electronic band structures and partial DOS.

**Figure S13.** The mapping of SHG signals.

**Figure S14.** Experimental LDT of reported chiral metal halides.

**Figure S15.** The comparison of SHG signal intensities.

**Figure S16.** Polarization dependence of SHG of (*S*-APD)PbBr<sub>4</sub> crystal.

**Figure S17.** The intensities of circular polarization-resolved SHG.

**Figure S18.** Summary of SHG-CD with different crystal thicknesses.

**Figure S19.** Renormalized band gaps of (*S*-APD)PbBr<sub>4</sub> at 0-300 K.

**Figure S20.** Renormalized band gaps of (*S*-APD)PbBr<sub>4</sub> at 400-700 K.

**Figure S21.** Renormalized band gaps of (1*S*,2*S*-DACH)<sub>2</sub>PbBr<sub>6</sub>·2H<sub>2</sub>O.

**Figure S22.** Renormalized band gaps of (1*S*,2*S*-DACH)<sub>2</sub>PbBr<sub>6</sub>·2H<sub>2</sub>O.

**Figure S23.** Summary of Electro-phonon renormalized band gaps.

**Figure S24.** The structures of unite cell.

**Table S1.** Crystal data and structure refinement of (*R*-/*S*-APD)PbBr<sub>4</sub>.

**Table S2.** Crystal data (1*R*,2*R*-/1*S*,2*S*-DACH)<sub>2</sub>PbBr<sub>6</sub>·2H<sub>2</sub>O.

**Table S3.** Bond Lengths for (*R*-/*S*-APD)PbBr<sub>4</sub>.

**Table S4.** Bond Lengths for (1*R*,2*R*-/1*S*,2*S*-DACH)<sub>2</sub>PbBr<sub>6</sub>·2H<sub>2</sub>O.

**Table S5.** The calculation of octahedral distortion.

**Table S6.** Comparison of LDT of chiral metal halides in literatures and this work.

**Table S7.** Comparison of *g*<sub>SHG-CD</sub> in the literature and this work.

### 3. References

## 1. Experimental Section

**Materials.** *R*-3-Aminopiperidine dihydrochloride (*R*-APD·2HCl, Innochem, 98%), *S*-3-Aminopiperidine dihydrochloride (*S*-APD·2HCl, Innochem, 97%), 1*R*,2*R*-diaminocyclohexane (1*R*,2*R*-DACH, Innochem, 98%), 1*S*,2*S*-diaminocyclohexane (1*S*,2*S*-DACH, Innochem, 98%), Hydrobromic acid (HBr, ≥48% in H<sub>2</sub>O, AR, KESHI), lead (II) acetate (Pb(OAc)<sub>2</sub>·3H<sub>2</sub>O, Innochem, 99.5%), lead (II) oxide (PbO, Alfa Aesar, 99.99%), lead (II) bromide (PbBr<sub>2</sub>, Aladdin, 99.0%) all reagents and solvents were used without further purification.

**Synthesis of (*R*-/*S*-APD)PbBr<sub>4</sub> single crystals.** (*R*-/*S*-APD)PbBr<sub>4</sub> was prepared with stoichiometric quantities of (Pb(OAc)<sub>2</sub>·3H<sub>2</sub>O (1 mmol, 379 mg) and *R*-/*S*-APD·2HCl (1 mmol, 187.19 mg) in HBr solution (4 mL). After obtaining a clear solution by heating the mixture at 120 °C and stirring for 30 min. And the colorless platelike crystals of (*R*-/*S*-APD)PbBr<sub>4</sub> were obtained at room temperature overnight. The crystals were washed with cold diethyl ether.

**Synthesis of (1*R*,2*R*-/1*S*,2*S*-DACH)<sub>2</sub>PbBr<sub>6</sub>·2H<sub>2</sub>O single crystals.** (1*R*,2*R*-/1*S*,2*S*-DACH)<sub>2</sub>PbBr<sub>6</sub>·2H<sub>2</sub>O was prepared with an amount of PbO (2 mmol, 466 mg) powder dissolved in HBr solution (6.0 mL). After obtaining a clear solution by heating the mixture at 120 °C and stirring for 30 min. And then the 1*R*,2*R*-/1*S*,2*S*-DACH (2 mmol, 228 mg) was added to the solution. The needle-like white crystals of (1*R*,2*R*-/1*S*,2*S*-DACH)<sub>2</sub>PbBr<sub>6</sub>·2H<sub>2</sub>O were obtained at room temperature overnight.

**Synthesis of bulk single crystals of (*R*-/*S*-APD)PbBr<sub>4</sub> and (1*R*,2*R*-/1*S*,2*S*-DACH)<sub>2</sub>PbBr<sub>6</sub>·2H<sub>2</sub>O.** *R*-/*S*-APD·2HCl (4.15 mmol, 718 mg) and PbBr<sub>2</sub> (4.15 mmol, 1550 mg) were dissolved in 30.0 mL of HBr solution at 65 °C under constant stirring and formed a pale yellow transparent solution. The solution was filtered with a 0.2 μm Teflon syringe filter after cooling to room temperature. Block-shaped colorless (*R*-/*S*-APD)PbBr<sub>4</sub> single crystals were grown in an ambient atmosphere for about several weeks. The same method was used to prepare the bulk single crystals of (1*R*,2*R*-/1*S*,2*S*-

DACH)<sub>2</sub>PbBr<sub>6</sub>·2H<sub>2</sub>O.

**Characterization.** Powder X-ray diffraction (PXRD) experiments were carried out using a Rigaku Ultima IV X-ray diffraction instrument in the  $2\theta$  between  $5^\circ$  and  $50^\circ$  with a step size of  $0.02^\circ$  under Cu K $\alpha$  radiation ( $\lambda = 1.541871 \text{ \AA}$ ). Single crystal X-ray diffraction (SCXRD) measurements were performed using a XtaLAB Synergy R, DW system, HyPix diffractometer under Mo K $\alpha$  ( $\lambda = 0.71073$ ). The single crystal structures were determined using the SHELXT methods with Olex2 program1. Thermogravimetric analyses (TGA) patterns were obtained using a Linseis STA PT1600 under N<sub>2</sub> atmosphere in the temperature range of 25 to 800 °C, with a heating rate of 10 °C/min. UV-vis absorption spectra were collected using a UV-vis spectrophotometer (UV 2600). Solid-state circular dichroism (CD) spectra were acquired using a JASCO J-1500 CD spectrometer. The perovskite sample was ground into powder. The samples for CD measurement were prepared though pressing the chiral perovskite powder and KBr powder (chiral perovskite: KBr = 1:100, w:w) into a pellet.

**Second Harmonic Generation (SHG) Measurements.** The SHG measurements of chiral perovskites were examined by using a home-built multiphoton nonlinear optical microscope system with a femtosecond pump (Mai Tai HP, 100 fs, 80 MHz, wavelength ranging from 690 to 1040 nm) in reflection geometry. The measurements were conducted under a reflection geometry at a  $45^\circ$  angle of both incidence and detection. The linearly polarized and circularly polarized pumps were altered with the  $\lambda/2$  and  $\lambda/4$  plates, respectively. For linear polarization-resolved SHG measurement, a  $\lambda/2$  waveplate and an analyzer were respectively placed in the incident and output light path. For circular polarization-resolved SHG measurements, the  $\lambda/2$  waveplate was replaced by a  $\lambda/4$  waveplate and placed in the incident light path to modulate its polarization between LCP and RCP states. The power-dependent SHG measurements were completed by collecting the SHG signal intensity with increasing laser power upon laser excitation at specific wavelengths. When at a certain laser power, the SHG

intensity begins to deviate from the well-fitted quadratic relationship or drop. This power has been hence identified as the laser damage threshold (LDT) of the single crystal. The LDT was defined as  $LDT = P/(F \times \pi r^2 t)$ , where  $P$ , denoted incident power when the SHG signal is offset from the square dependence,  $F$ ,  $r$  and  $t$  are frequency and radius of laser spot, pulse width, respectively. The laser spot was  $\sim 20 \mu\text{m}$  in diameter. The pulse width was  $\sim 100$  fs. The frequency was 80 MHz. The second-order NLO susceptibility of the chiral perovskites was determined by using Y-cut quartz with a  $d_{\text{eff}}$  of 0.3 pm/V as the reference.

**Theoretical Calculations.** The DFT calculations were performed using the program VASP (Vienna Ab Initio Simulation Package) 5.4.4, and the raw data was analyzed by vaspkit 1.4.1. We used the GGA-PBE function to describe the exchange correlation. A 400 eV kinetic energy cutoff and a  $4 \times 3 \times 2$  for  $(R-/S\text{-APD})\text{PbBr}_4$  /  $3 \times 3 \times 1$  for  $(1R,2R-/1S,2S\text{-DACH})_2\text{PbBr}_6 \cdot 2\text{H}_2\text{O}$  gamma-centered K sampling grid were used for integration. The structures are firstly fully relaxed until the Hellmann–Feynmann force on each atom and the total energy difference between neighboring loops reach  $10^{-6}$  eV and  $0.02 \text{ eV} \cdot \text{Ang}^{-1}$  within 500 loops limitation. For the band structure, the K-Path was generated by vaspkit 1.4.1. Besides DOS, the PDOS (projected density of states) has been also calculated. PDOS is calculated as projected DOS, where the information about the different contributions of the different elements is computed.

## 2. Characterization

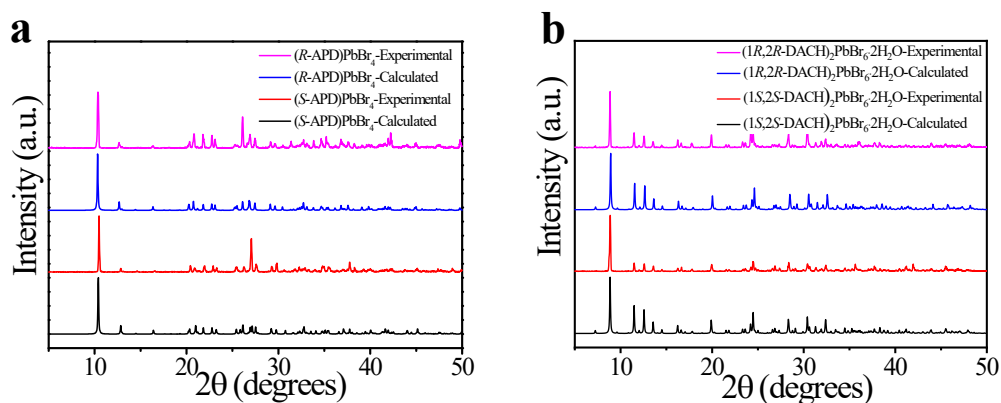

**Figure S1.** Experimental and calculated powder X-ray diffraction (PXRD) patterns of **a.**  $(R-/S-APD)PbBr_4$  and **b.**  $(1R,2R-/1S,2S-DACH)_2PbBr_6 \cdot 2H_2O$ .

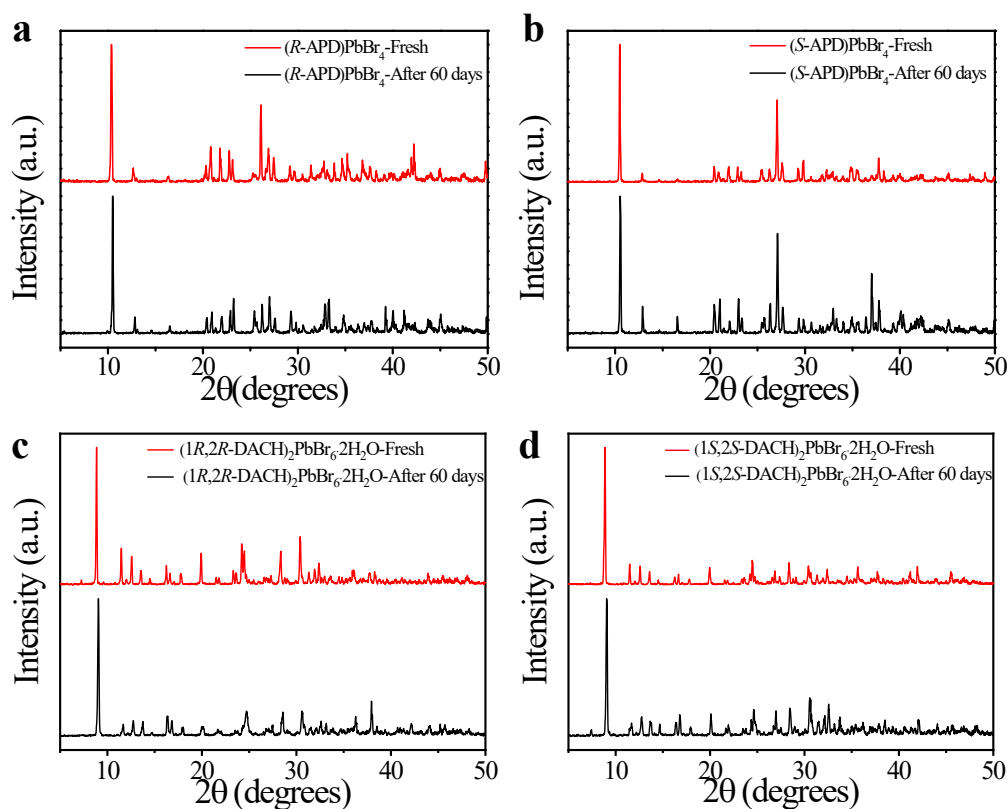

**Figure S2.** Powder X-ray diffraction (PXRD) patterns of the as-prepared and exposed in the air after 60 days. **a.**  $(R-APD)PbBr_4$ , **b.**  $(S-APD)PbBr_4$ , **c.**  $(1R,2R-DACH)_2PbBr_6 \cdot 2H_2O$ , **d.**  $(1S,2S-DACH)_2PbBr_6 \cdot 2H_2O$ .

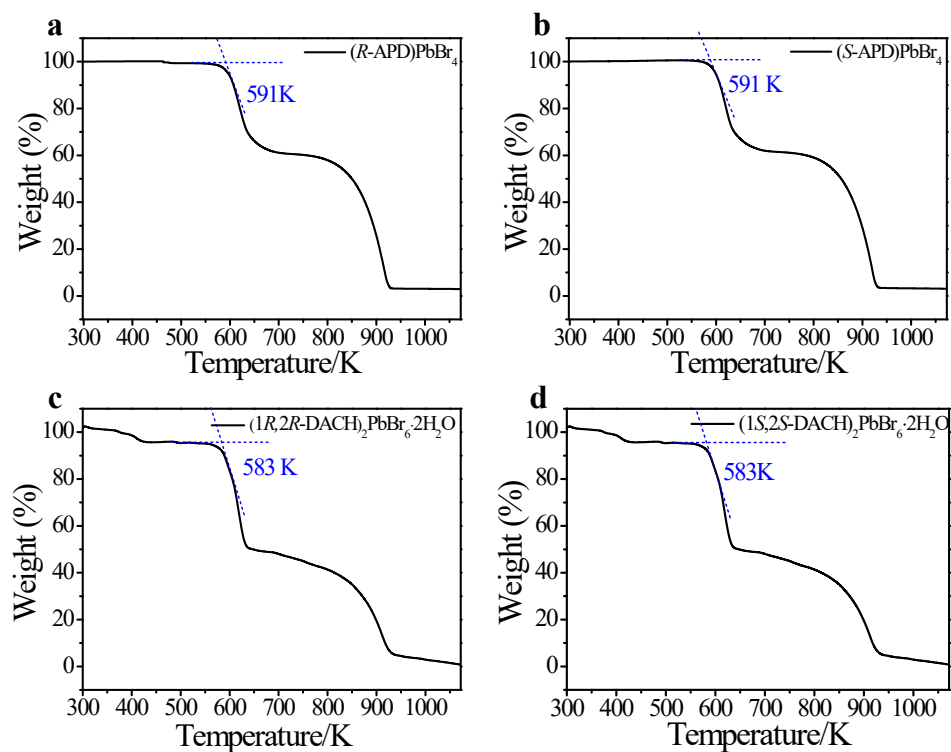

**Figure S3.** Thermal stability of **a.**  $(R\text{-APD})\text{PbBr}_4$ , **b.**  $(S\text{-APD})\text{PbBr}_4$ , **c.**  $(1R,2R\text{-DACH})_2\text{PbBr}_6 \cdot 2\text{H}_2\text{O}$  and **d.**  $(1S,2S\text{-DACH})_2\text{PbBr}_6 \cdot 2\text{H}_2\text{O}$ , was measured by the thermogravimetric analysis (TGA) method.

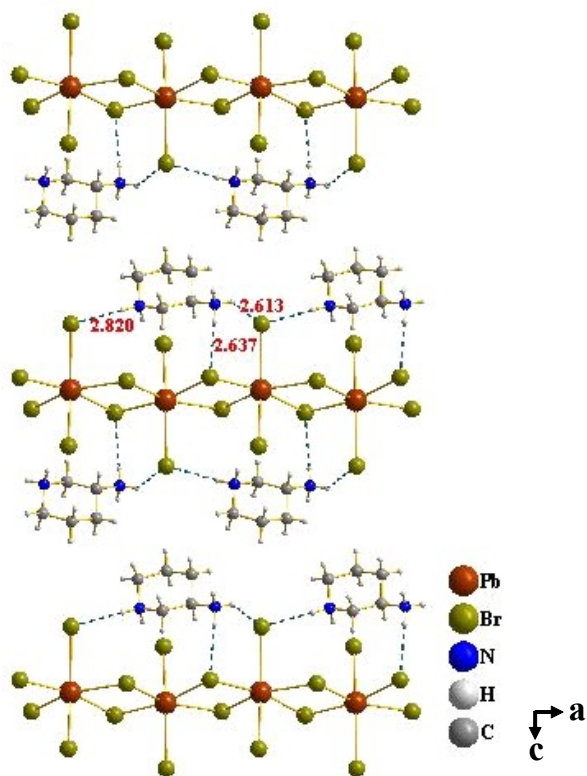

**Figure S4.** The hydrogen bonding  $\text{N-H} \cdots \text{Br}$  of  $(R\text{-APD})\text{PbBr}_4$ , which are marked by the dotted blue lines.

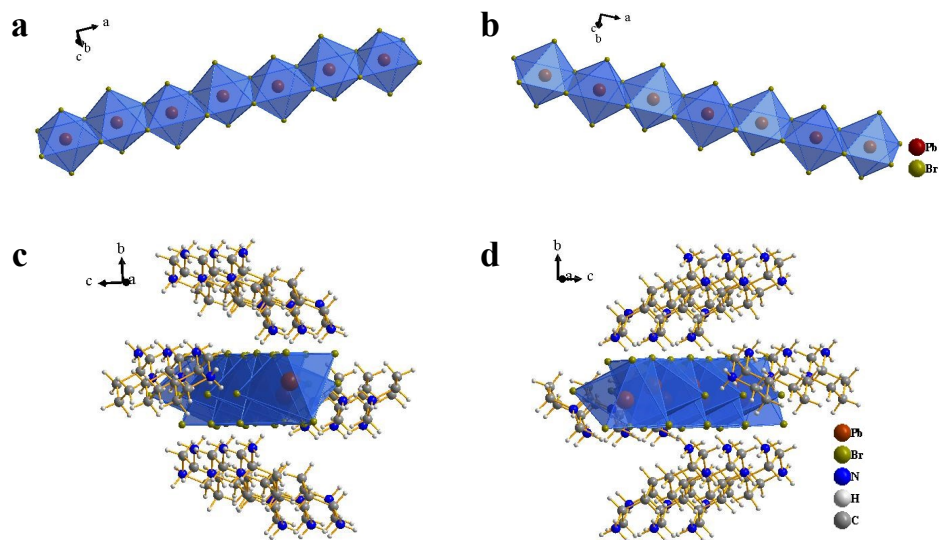

**Figure S5.** **a.** View of the individual inorganic chain based on edge-shared  $[\text{PbBr}_6]^{4-}$  octahedrons of  $(R\text{-APD})\text{PbBr}_4$ . **b.** View of the individual inorganic chain based on edge-shared  $[\text{PbBr}_6]^{4-}$  octahedrons of  $(S\text{-APD})\text{PbBr}_4$ . **c.** View of an individual one-dimensional inorganic chain wrapped by the organic cations of  $(R\text{-APD})\text{PbBr}_4$ . **d.** View of an individual one-dimensional inorganic chain wrapped by the organic cations of  $(S\text{-APD})\text{PbBr}_4$ .

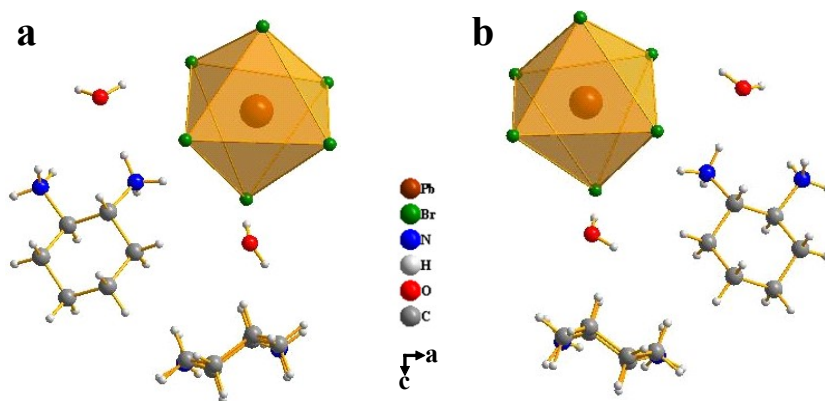

**Figure S6.** The asymmetry unit of **a.**  $(1R,2R\text{-DACH})_2\text{PbBr}_6 \cdot 2\text{H}_2\text{O}$  and **b.**  $(1S,2S\text{-DACH})_2\text{PbBr}_6 \cdot 2\text{H}_2\text{O}$  as viewed from the  $b$ -axis.



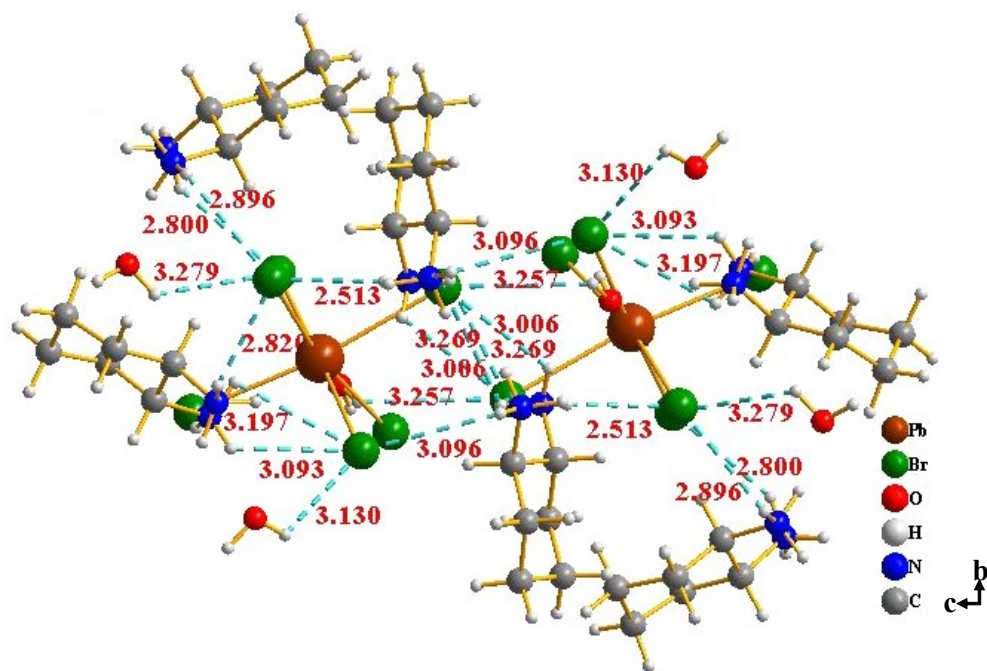

**Figure S7.** The hydrogen bonding N-H $\cdots$ Br and O-H $\cdots$ Br of (1*R*,2*R*-DACH)<sub>2</sub>PbBr<sub>6</sub>·2H<sub>2</sub>O, which are marked by the dotted blue lines.

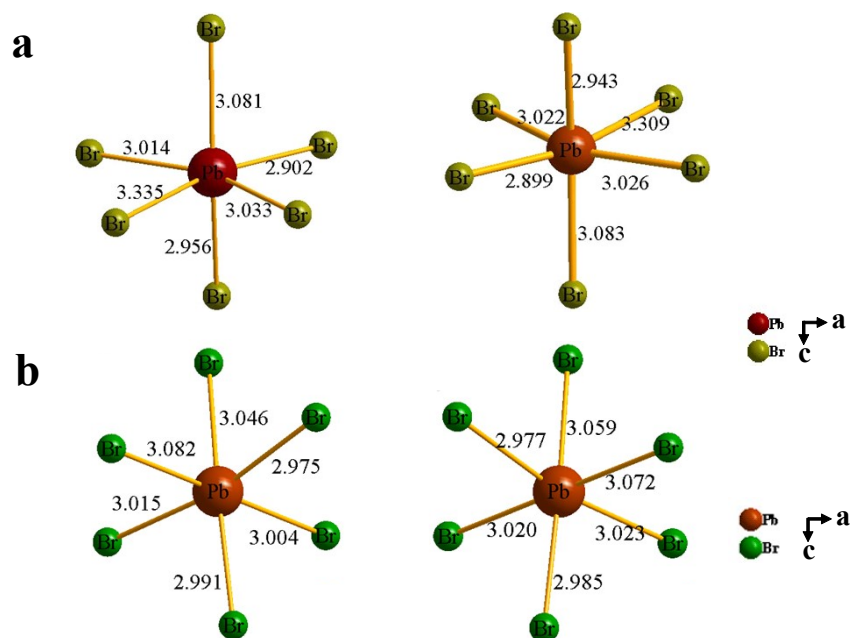

**Figure S8. a.** The distorted [PbBr<sub>6</sub>]<sup>4-</sup> structure of (*R*-APD)PbBr<sub>4</sub> (left) and (*S*-APD)PbBr<sub>4</sub> (right). **b.** The distorted [PbBr<sub>6</sub>]<sup>4-</sup> structure of (1*R*,2*R*-DACH)<sub>2</sub>PbBr<sub>6</sub>·2H<sub>2</sub>O (left) and (1*S*,2*S*-DACH)<sub>2</sub>PbBr<sub>6</sub>·2H<sub>2</sub>O (right).

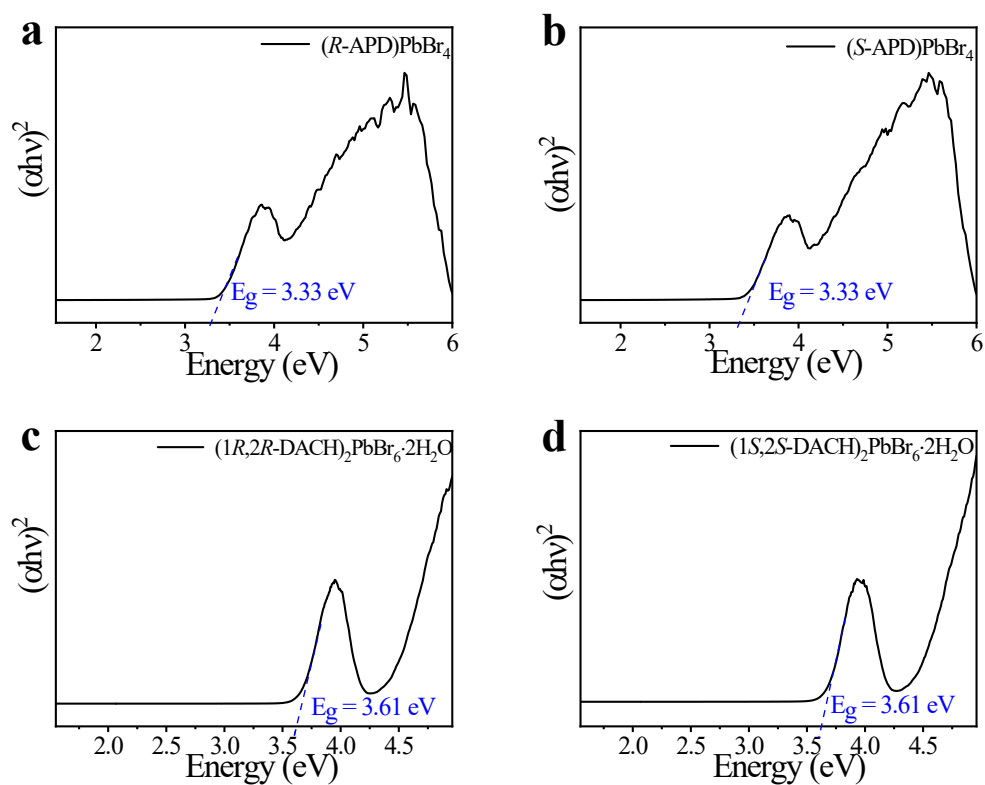

**Figure S9.** The corresponding Tauc plots of **a.**  $(R\text{-APD})\text{PbBr}_4$ , **b.**  $(S\text{-APD})\text{PbBr}_4$ , **c.**  $(1R,2R\text{-DACH})_2\text{PbBr}_6 \cdot 2\text{H}_2\text{O}$  and **d.**  $(1S,2S\text{-DACH})_2\text{PbBr}_6 \cdot 2\text{H}_2\text{O}$ , respectively.

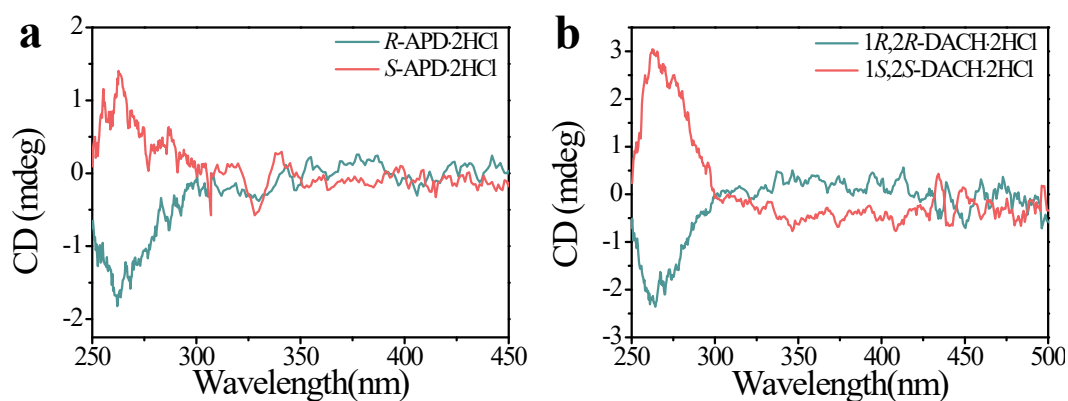

**Figure S10. a.** Circular dichroism spectra of  $R\text{-APD} \cdot 2\text{HCl}$  and  $S\text{-APD} \cdot 2\text{HCl}$ . **b.** Circular dichroism spectra of  $1R,2R\text{-DACH} \cdot 2\text{HCl}$  and  $1S,2S\text{-DACH} \cdot 2\text{HCl}$ .

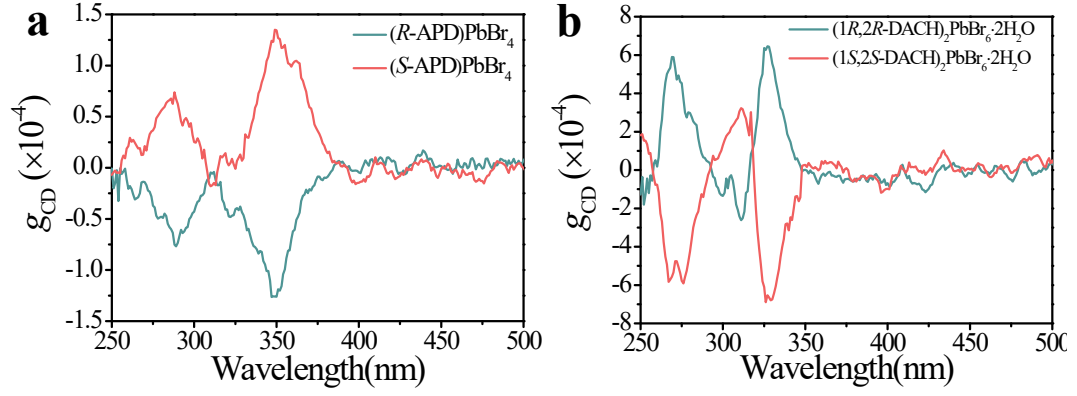

**Figure S11.** The  $g_{CD}$  spectra of **a.** (*R/S*-APD) $PbBr_4$  and **b.** (*1R,2R/1S,2S*-DACH) $_2PbBr_6 \cdot 2H_2O$ , respectively.

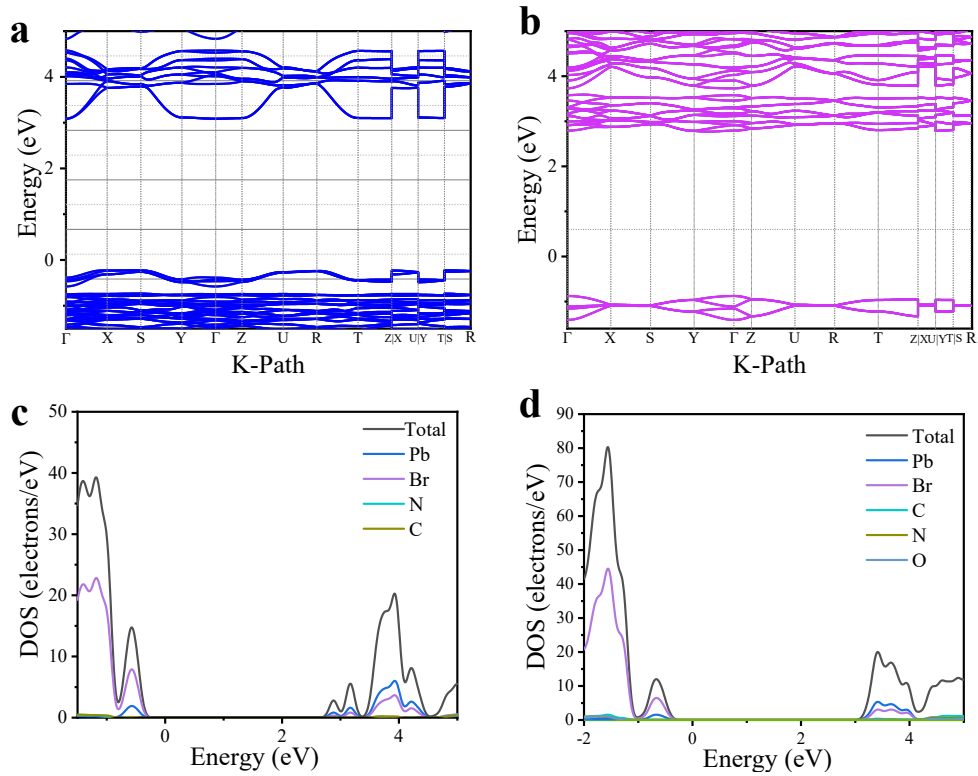

**Figure S12.** **a-b.** Calculated electronic band structures of (*R*-APD) $PbBr_4$  and (*1R,2R*-DACH) $_2PbBr_6 \cdot 2H_2O$ . **c-d.** Calculated partial DOS of (*R*-APD) $PbBr_4$  and (*1R,2R*-DACH) $_2PbBr_6 \cdot 2H_2O$ .

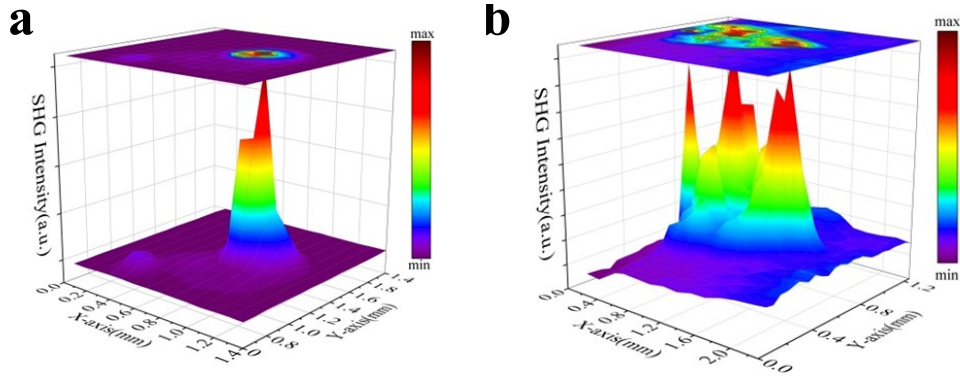

**Figure S13. a.** The scanned image of (S-APD)PbBr<sub>4</sub> crystal by detecting the SHG signal at 520 nm when pumped 1040 nm. The scanned area is  $2.0 \times 1.2 \text{ mm}^2$ . **b.** The scanned image of (1S,2S-DACH)<sub>2</sub>PbBr<sub>6</sub>·2H<sub>2</sub>O crystal by detecting the SHG signal at 440 nm when pumped at 880 nm. The scanned area is  $2.0 \times 1 \text{ mm}^2$ .

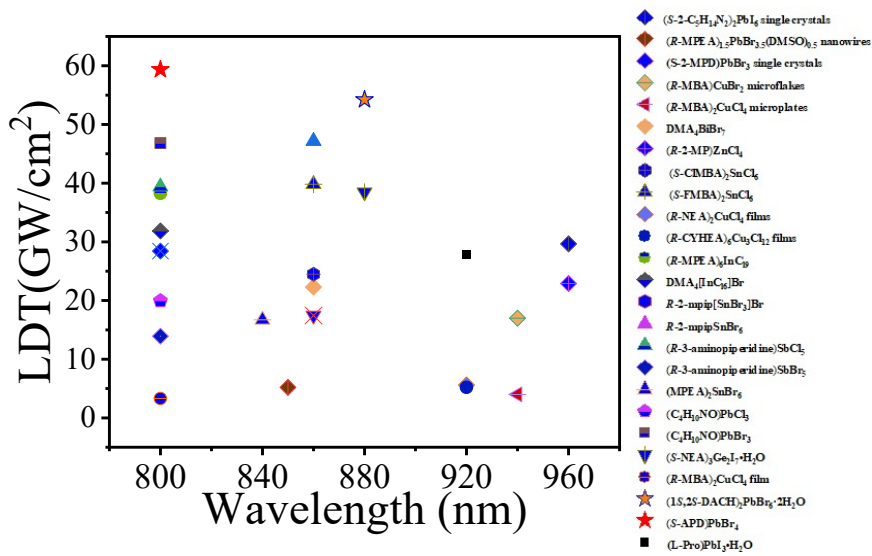

**Figure S14.** Comparison of LDT of chiral metal halides in literatures and this work.

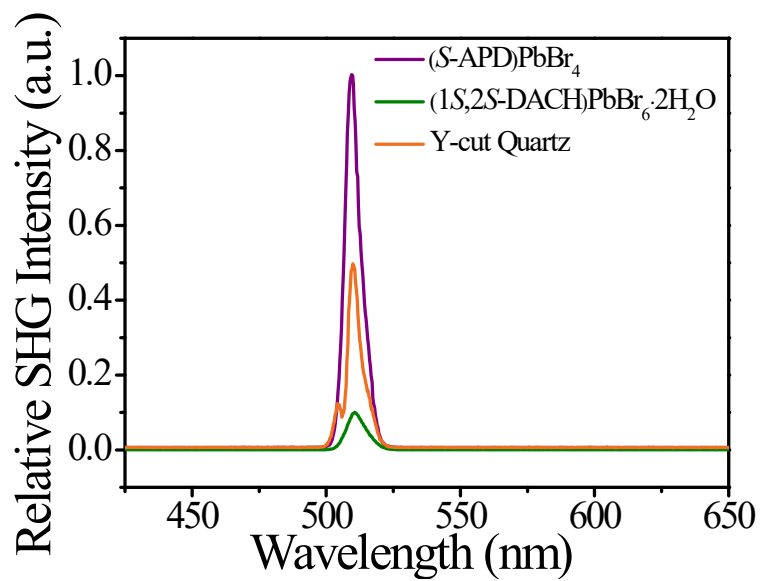

**Figure S15.** The comparison of SHG signal intensities of  $(S\text{-APD})\text{PbBr}_4$  and  $(1S,2S\text{-DACH})_2\text{PbBr}_6 \cdot 2\text{H}_2\text{O}$  crystals and Y-cut quartz at 1020 nm under the same test conditions.

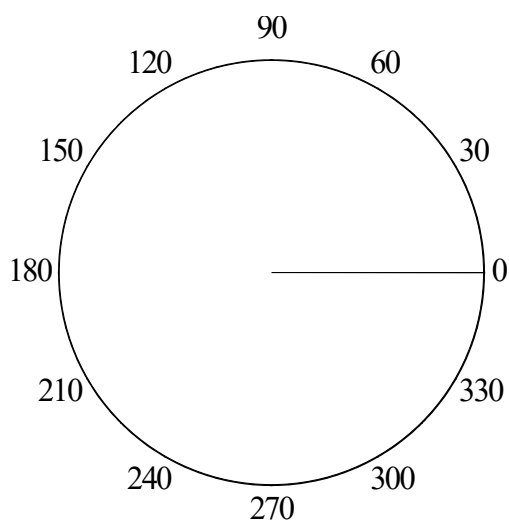

**Figure S16.** Polarization dependence of the SHG intensity of  $(S\text{-APD})\text{PbBr}_4$  crystal as a function of the linear polarization angle pumped at 1040 nm. The purple line is the nonlinear fitting of data points.

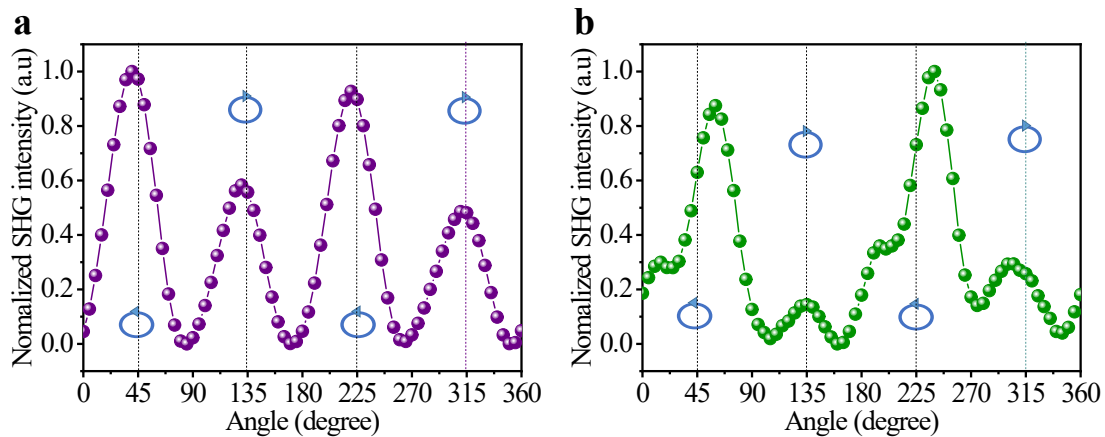

**Figure S17. a-b.** The SHG intensity of  $(R\text{-APD})\text{PbBr}_4$  and  $(1R,2R\text{-DACH})_2\text{PbBr}_6 \cdot 2\text{H}_2\text{O}$  crystals at various elliptic polarized angles pumped at 1040 nm laser, respectively. The laser is left-handed circularly polarized when the rotation angle is 45 and 225°, while it is right-handed circularly polarized at 135 and 315°, as indicated by the blue arrows. It is noted that the experimental observed SHG-CD spectra can vary significantly when measured at different spots on the same crystal plane, which may be attribute to the anisotropy of the crystal surface. Unless otherwise noted, the SHG-CD results reported herein represents that acquired under optimal condition.

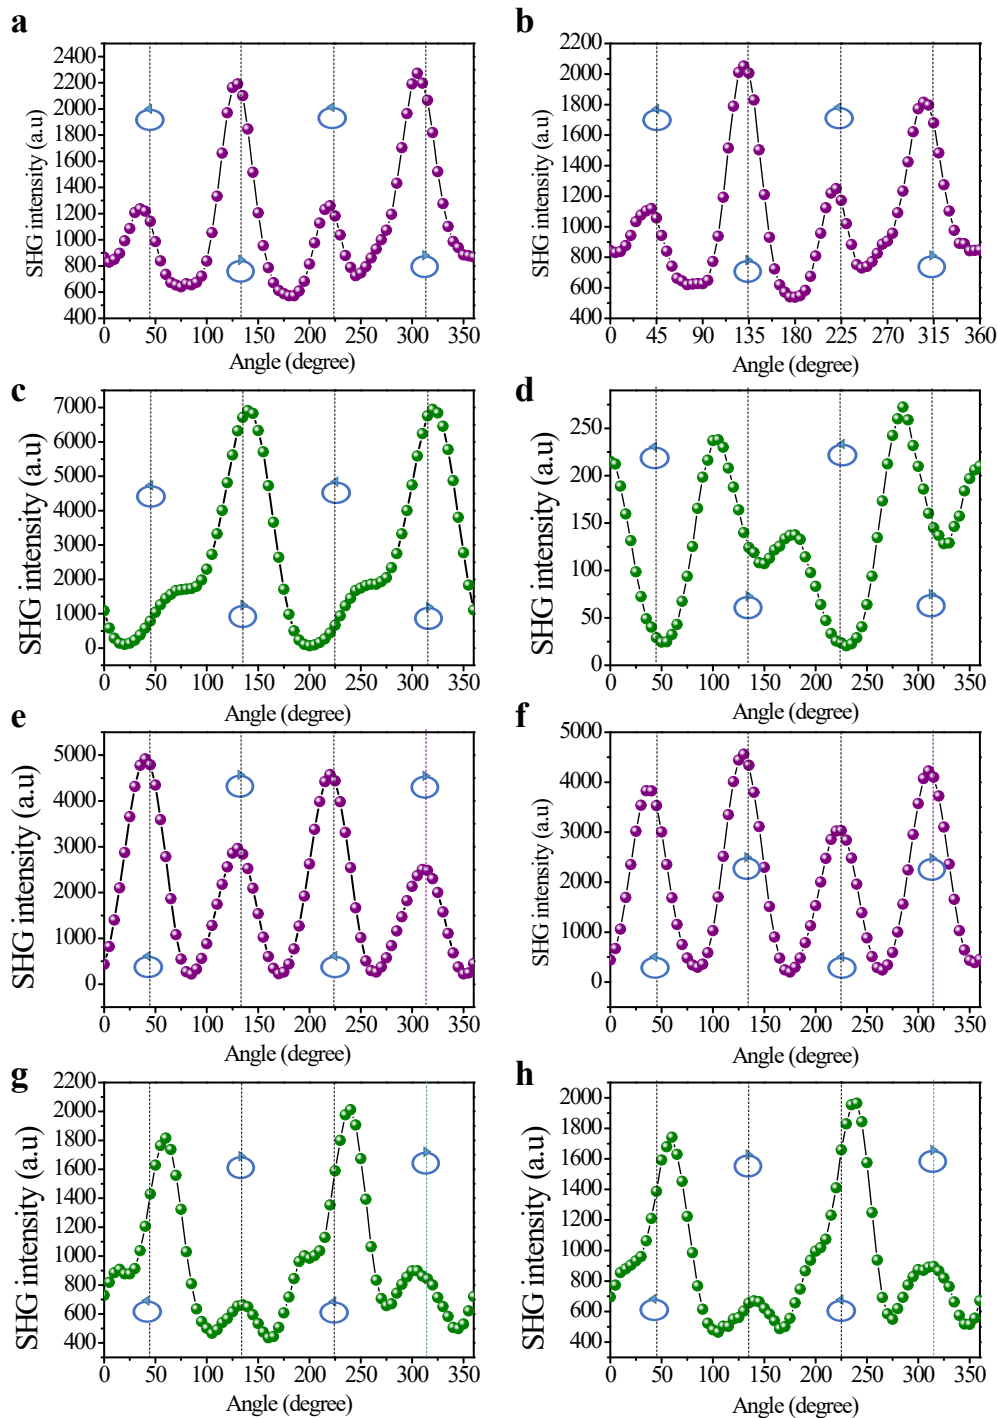

**Figure S18.** Summary of SHG-CD intensity at various elliptic polarized angles measured on different crystals. **a.** and **b.** The SHG-CD intensity of (*S*-APD)PbBr<sub>4</sub> crystals with thicknesses of ~200 and ~500 μm, respectively. **c.** and **d.** The SHG-CD intensity of (1*S*,2*S*-DACH)<sub>2</sub>PbBr<sub>6</sub>·2H<sub>2</sub>O crystals with thicknesses of ~200 and ~400 μm, respectively. **e.** and **f.** The SHG-CD intensity of (*R*-APD)PbBr<sub>4</sub> crystals with thicknesses of ~250 and ~500 μm, respectively. **g.** and **h.** The SHG-CD intensity of (1*R*,2*R*-DACH)<sub>2</sub>PbBr<sub>6</sub>·2H<sub>2</sub>O crystals with thicknesses of ~300 and ~500 μm, respectively. It is noted that Figures S18a, S18c, S18e and S18g corresponding to Figure 5c, Figure 5d, Figure S17a and Figure S17b, were used only for comparison of the SHG-CD intensity of different crystals.

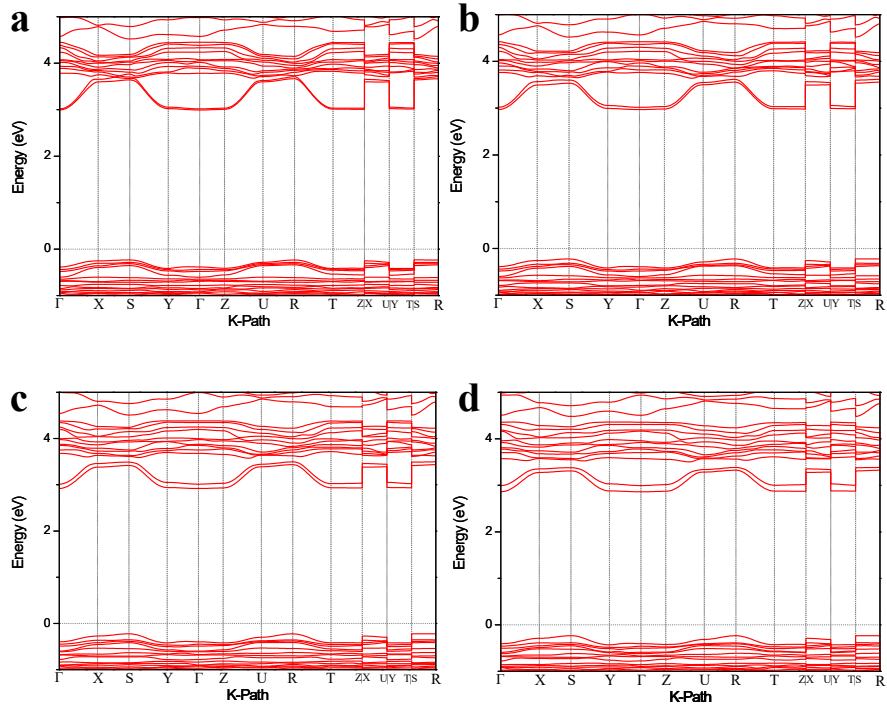

**Figure S19. Electro-phonon renormalized band gaps of (S-APD)PbBr<sub>4</sub>.** Calculated band structure considering the effect of electron-phonon coupling at 0 K (a), 100 K (b), 200 K (c) and 300 K (d). The electron-phonon interactions from ZG displacements were generated accounting for thermal lattice expansion.

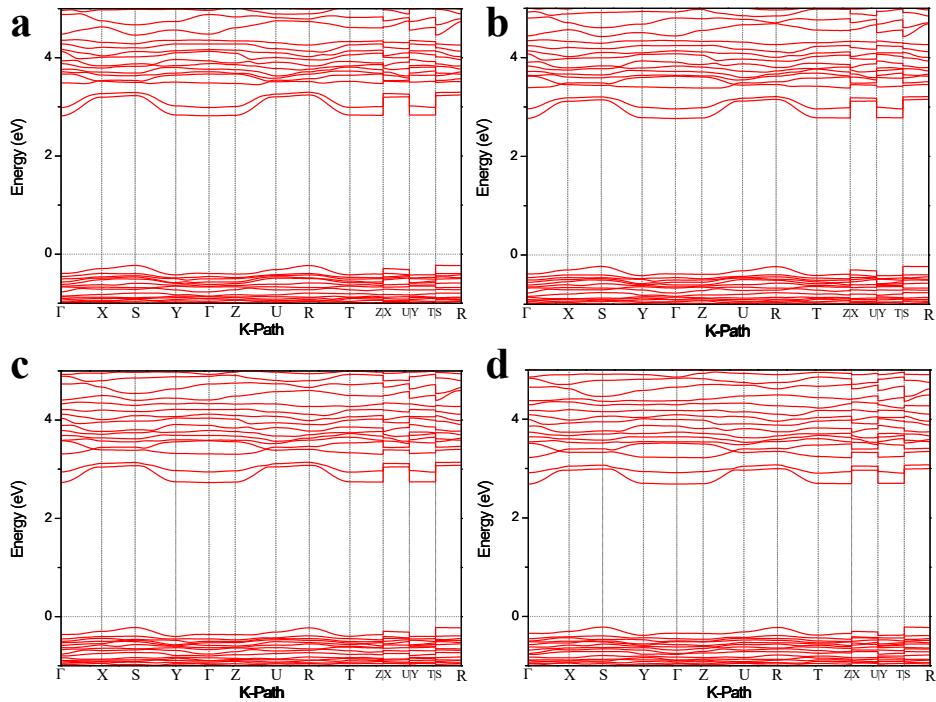

**Figure S20. Electro-phonon renormalized band gaps of (S-APD)PbBr<sub>4</sub>.** Calculated band structure considering the effect of electron-phonon coupling at 400 K (a), 500 K (b), 600 K (c) and 700 K (d). The electron-phonon interactions from ZG displacements were generated accounting for thermal lattice expansion.



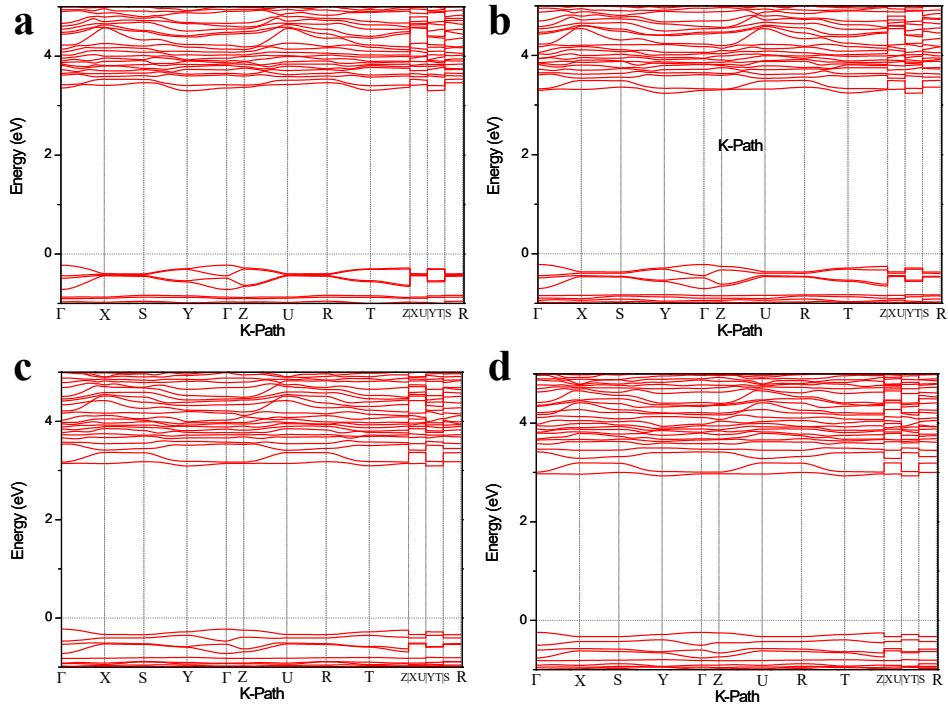

**Figure S21. Electro-phonon renormalized band gaps of  $(1S,2S\text{-DACH})_2\text{PbBr}_6 \cdot 2\text{H}_2\text{O}$ .** Calculated band structure considering the effect of electron-phonon coupling at 0 K (a), 100 K (b), 200 K (c) and 300 K (d). The electron-phonon interactions from ZG displacements were generated accounting for thermal lattice expansion.

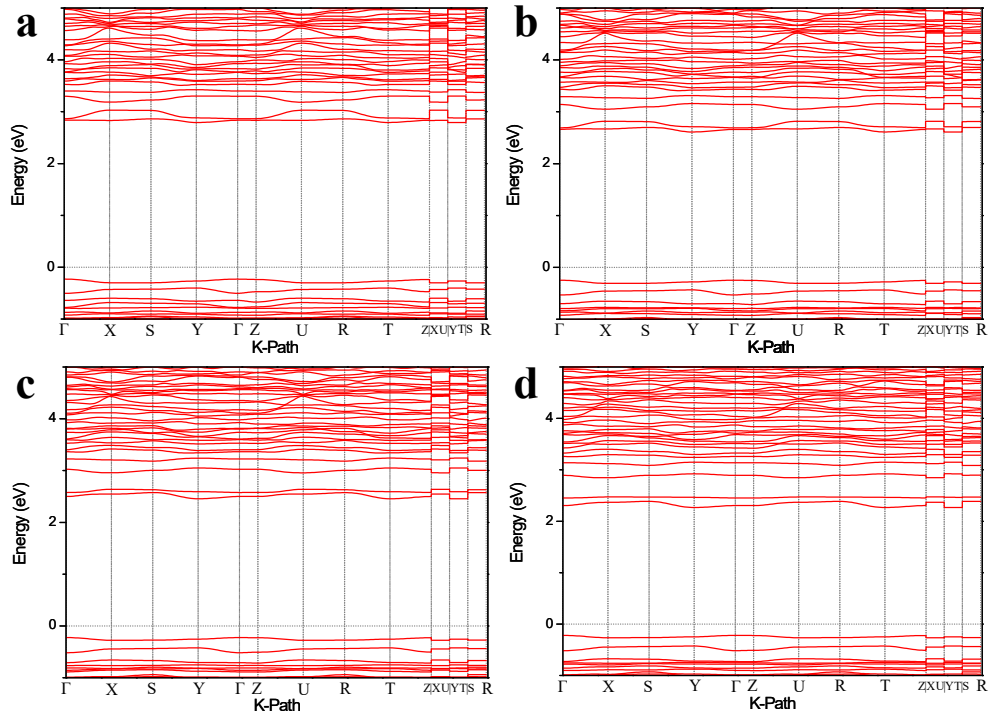

**Figure S22. Electro-phonon renormalized band gaps of  $(1S,2S\text{-DACH})_2\text{PbBr}_6 \cdot 2\text{H}_2\text{O}$ .** Calculated band structure considering the effect of electron-phonon coupling at 400 K (a), 500 K (b), 600 K (c) and 700 K (d). The electron-phonon interactions from ZG displacements were generated accounting for thermal lattice expansion.

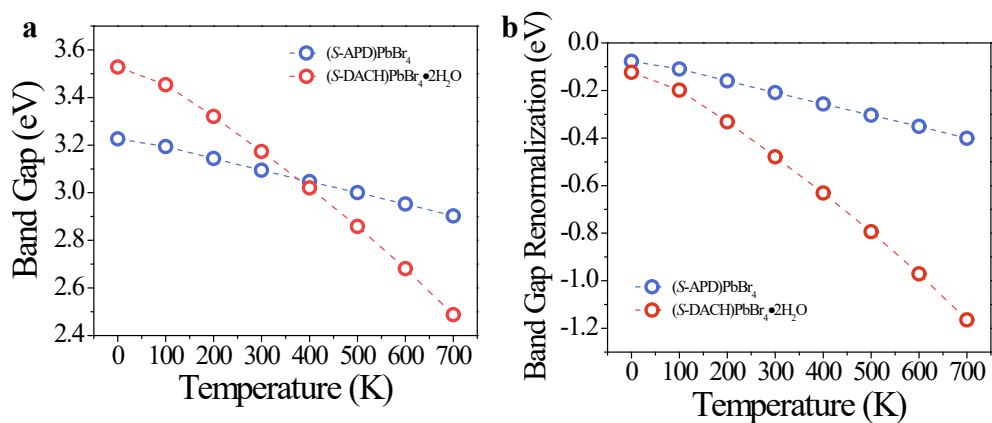

**Figure S23.** Electro-phonon renormalized band gaps of (S-APD)PbBr<sub>4</sub> and (1S,2S-DACH)<sub>2</sub>PbBr<sub>6</sub>·2H<sub>2</sub>O. Phonon-induced band gap renormalization of (S-APD)PbBr<sub>4</sub> (blue) and (1S,2S-DACH)<sub>2</sub>PbBr<sub>6</sub>·2H<sub>2</sub>O (red).

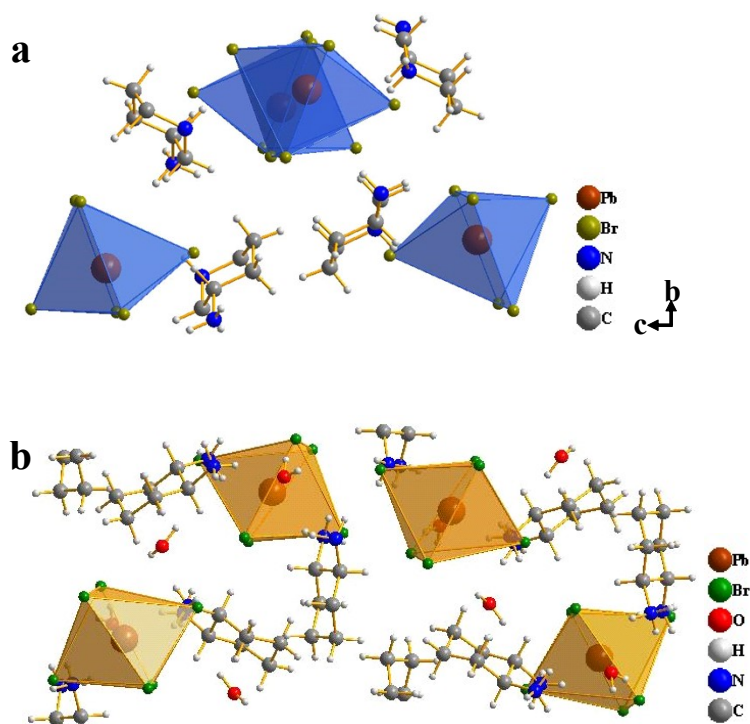

**Figure S24.** **a.** The unite cell structure of (S-APD)PbBr<sub>4</sub>. **b.** The unite cell structure of (1S,2S-DACH)<sub>2</sub>PbBr<sub>6</sub>·2H<sub>2</sub>O.

**Table S1.** Crystal data and structure refinement of (*R*-/*S*-APD)PbBr<sub>4</sub>.

| CCDC                                                | 2339434                                                             | 2339435                                                             |
|-----------------------------------------------------|---------------------------------------------------------------------|---------------------------------------------------------------------|
| Identification code                                 | ( <i>R</i> -APD)PbBr <sub>4</sub>                                   | ( <i>S</i> -APD)PbBr <sub>4</sub>                                   |
| Empirical formula                                   | C <sub>5</sub> H <sub>14</sub> N <sub>2</sub> PbBr <sub>4</sub>     | C <sub>5</sub> H <sub>14</sub> N <sub>2</sub> PbBr <sub>4</sub>     |
| Formula weight, g·mol <sup>-1</sup>                 | 629.01                                                              | 629.01                                                              |
| Temperature (K)                                     | 300                                                                 | 150                                                                 |
| Crystal system                                      | orthorhombic                                                        | orthorhombic                                                        |
| Space group                                         | <i>P</i> 2 <sub>1</sub> 2 <sub>1</sub> 2 <sub>1</sub>               | <i>P</i> 2 <sub>1</sub> 2 <sub>1</sub> 2 <sub>1</sub>               |
| <i>a</i> (Å)                                        | 8.7802(2)                                                           | 8.7810(3)                                                           |
| <i>b</i> (Å)                                        | 10.8321(3)                                                          | 10.8005(4)                                                          |
| <i>c</i> (Å)                                        | 13.9609(4)                                                          | 13.7783(5)                                                          |
| $\alpha$ (°)                                        | 90                                                                  | 90                                                                  |
| $\beta$ (°)                                         | 90                                                                  | 90                                                                  |
| $\gamma$ (°)                                        | 90                                                                  | 90                                                                  |
| <i>V</i> (Å <sup>3</sup> )                          | 1327.79(6)                                                          | 1306.72(8)                                                          |
| <i>Z</i>                                            | 4                                                                   | 4                                                                   |
| $\rho$ (calculated) (g/cm <sup>3</sup> )            | 3.147                                                               | 3.197                                                               |
| Absorption coefficient, mm <sup>-1</sup>            | 24.704                                                              | 25.103                                                              |
| <i>F</i> (000)                                      | 1120.0                                                              | 1120.0                                                              |
| Theta range for data collection                     | 5.48 to 52.74                                                       | 4.792 to 60.832                                                     |
|                                                     | -10 ≤ <i>h</i> ≤ 9                                                  | -11 ≤ <i>h</i> ≤ 11                                                 |
| Index ranges                                        | -13 ≤ <i>k</i> ≤ 13                                                 | -13 ≤ <i>k</i> ≤ 13                                                 |
|                                                     | -17 ≤ <i>l</i> ≤ 17                                                 | -15 ≤ <i>l</i> ≤ 19                                                 |
| Reflections collected                               | 9538                                                                | 9815                                                                |
| Independent reflections                             | 2707 [ <i>R</i> <sub>int</sub> = 0.0443]                            | 3208 [ <i>R</i> <sub>int</sub> = 0.0954]                            |
| Data/restraints/parameters                          | 2707/0/110                                                          | 3208/42/110                                                         |
| Goodness-of-fit on <i>F</i> <sup>2</sup>            | 1.095                                                               | 1.170                                                               |
| Final <i>R</i> indices [ <i>I</i> > 2σ( <i>I</i> )] | <i>R</i> <sub>1</sub> = 0.0341, w <i>R</i> <sub>2</sub> =<br>0.0795 | <i>R</i> <sub>1</sub> = 0.0711, w <i>R</i> <sub>2</sub> =<br>0.1867 |
| <i>R</i> indices (all data)                         | <i>R</i> <sub>1</sub> = 0.0368, w <i>R</i> <sub>2</sub> =<br>0.0804 | <i>R</i> <sub>1</sub> = 0.0797, w <i>R</i> <sub>2</sub> =<br>0.1925 |
| Largest diff. peak and hole,<br>e.Å <sup>-3</sup>   | 1.22 and -2.66                                                      | 6.72 and -4.70                                                      |
| Flack parameter                                     | -0.012(8)                                                           | -0.02(3)                                                            |

**Table S2.** Crystal data and structure refinement of (1*R*,2*R*-/1*S*,2*S*-DACH)<sub>2</sub>PbBr<sub>6</sub>·2H<sub>2</sub>O.

| CCDC                                                | 2339436                                                                          | 2339439                                                                          |
|-----------------------------------------------------|----------------------------------------------------------------------------------|----------------------------------------------------------------------------------|
| Identification code                                 | (1 <i>R</i> ,2 <i>R</i> -DACH) <sub>2</sub> PbBr <sub>6</sub> ·2H <sub>2</sub> O | (1 <i>S</i> ,2 <i>S</i> -DACH) <sub>2</sub> PbBr <sub>6</sub> ·2H <sub>2</sub> O |
| Empirical formula                                   | C <sub>12</sub> H <sub>36</sub> N <sub>4</sub> O <sub>2</sub> PbBr <sub>6</sub>  | C <sub>12</sub> H <sub>36</sub> N <sub>4</sub> O <sub>2</sub> PbBr <sub>6</sub>  |
| Formula weight, g·mol <sup>-1</sup>                 | 955.10                                                                           | 955.10                                                                           |
| Temperature (K)                                     | 150                                                                              | 293                                                                              |
| Crystal system                                      | orthorhombic                                                                     | orthorhombic                                                                     |
| Space group                                         | <i>P</i> 2 <sub>1</sub> 2 <sub>1</sub> 2 <sub>1</sub>                            | <i>P</i> 2 <sub>1</sub> 2 <sub>1</sub> 2 <sub>1</sub>                            |
| <i>a</i> (Å)                                        | 9.8774(2)                                                                        | 9.9329(2)                                                                        |
| <i>b</i> (Å)                                        | 10.8539(2)                                                                       | 10.9337(3)                                                                       |
| <i>c</i> (Å)                                        | 24.3071(5)                                                                       | 24.3960(6)                                                                       |
| $\alpha$ (°)                                        | 90                                                                               | 90                                                                               |
| $\beta$ (°)                                         | 90                                                                               | 90                                                                               |
| $\gamma$ (°)                                        | 90                                                                               | 90                                                                               |
| <i>V</i> (Å <sup>3</sup> )                          | 2605.92(9)                                                                       | 2649.49(11)                                                                      |
| <i>Z</i>                                            | 4                                                                                | 4                                                                                |
| $\rho$ (calculated) (g/cm <sup>3</sup> )            | 2.434                                                                            | 2.394                                                                            |
| Absorption coefficient, mm <sup>-1</sup>            | 15.688                                                                           | 23.099                                                                           |
| <i>F</i> (000)                                      | 1776                                                                             | 1776                                                                             |
| Theta range for data collection                     | 4.11 to 61.462                                                                   | 3.624 to 67.239                                                                  |
|                                                     | -10 ≤ <i>h</i> ≤ 13                                                              | -8 ≤ <i>h</i> ≤ 11                                                               |
| Index ranges                                        | -14 ≤ <i>k</i> ≤ 12                                                              | -12 ≤ <i>k</i> ≤ 13                                                              |
|                                                     | -31 ≤ <i>l</i> ≤ 29                                                              | -28 ≤ <i>l</i> ≤ 29                                                              |
| Reflections collected                               | 23794                                                                            | 16990                                                                            |
| Independent reflections                             | 6672 [ <i>R</i> <sub>int</sub> = 0.0284]                                         | 4731 [ <i>R</i> <sub>int</sub> = 0.07]                                           |
| Data/restraints/parameters                          | 6672/0/236                                                                       | 4731 / 0 / 231                                                                   |
| Goodness-of-fit on <i>F</i> <sup>2</sup>            | 1.023                                                                            | 1.063                                                                            |
| Final <i>R</i> indices [ <i>I</i> > 2σ( <i>I</i> )] | <i>R</i> <sub>1</sub> = 0.0206, <i>wR</i> <sub>2</sub> = 0.0330                  | <i>R</i> <sub>1</sub> = 0.0452, <i>wR</i> <sub>2</sub> = 0.1141                  |
| <i>R</i> indices (all data)                         | <i>R</i> <sub>1</sub> = 0.0249, <i>wR</i> <sub>2</sub> = 0.0336                  | <i>R</i> <sub>1</sub> = 0.0469, <i>wR</i> <sub>2</sub> = 0.1167                  |
| Largest diff. peak and hole, e.Å <sup>-3</sup>      | 0.69 and -0.63                                                                   | 1.841 and -2.254                                                                 |
| Flack parameter                                     | -0.018(3)                                                                        | -0.053(6)                                                                        |

**Table S3.** Bond Lengths for (*R*-/*S*-APD)PbBr<sub>4</sub>.

| <i>(R</i> -APD)PbBr <sub>4</sub> |                  |            | <i>(S</i> -APD)PbBr <sub>4</sub> |                  |          |
|----------------------------------|------------------|------------|----------------------------------|------------------|----------|
| Atom                             | Atom             | Length/Å   | Atom                             | Atom             | Length/Å |
| Pb1                              | Br2              | 3.0136(13) | Pb1                              | Br1 <sup>1</sup> | 3.026(3) |
| Pb1                              | Br2 <sup>1</sup> | 3.0334(13) | Pb1                              | Br1              | 3.021(3) |
| Pb1                              | Br3              | 2.9560(13) | Pb1                              | Br2              | 2.943(2) |
| Pb1                              | Br4              | 3.0810(14) | Pb1                              | Br3              | 2.898(3) |
| Pb1                              | Br5              | 2.9023(14) | Pb1                              | Br4              | 3.083(3) |
| Pb1                              | Br6              | 3.3350(14) | Pb1                              | Br5              | 3.309(2) |

**Table S4.** Bond Lengths for (1*R*,2*R*-/1*S*,2*S*-DACH)<sub>2</sub>PbBr<sub>6</sub>·2H<sub>2</sub>O.

| (1 <i>R</i> ,2 <i>R</i> -DACH) <sub>2</sub> PbBr <sub>6</sub> ·2H <sub>2</sub> O |      |           | (1 <i>S</i> ,2 <i>S</i> -DACH) <sub>2</sub> PbBr <sub>6</sub> ·2H <sub>2</sub> O |      |            |
|----------------------------------------------------------------------------------|------|-----------|----------------------------------------------------------------------------------|------|------------|
| Atom                                                                             | Atom | Length/Å  | Atom                                                                             | Atom | Length/Å   |
| Pb1                                                                              | Br1  | 3.0154(5) | Pb1                                                                              | Br6  | 2.9766(17) |
| Pb1                                                                              | Br2  | 3.0463(5) | Pb1                                                                              | Br1  | 2.9848(17) |
| Pb1                                                                              | Br3  | 2.9752(5) | Pb1                                                                              | Br2  | 3.0195(16) |
| Pb1                                                                              | Br4  | 3.0039(5) | Pb1                                                                              | Br5  | 3.0230(16) |
| Pb1                                                                              | Br5  | 2.9911(5) | Pb1                                                                              | Br3  | 3.0588(16) |
| Pb1                                                                              | Br6  | 3.0820(5) | Pb1                                                                              | Br4  | 3.0717(18) |

**Table S5.** Octahedral distortion calculation for (*R*-/*S*-APD)PbBr<sub>4</sub> and (1*R*,2*R*-/1*S*,2*S*-DACH)<sub>2</sub>PbBr<sub>6</sub>·2H<sub>2</sub>O.

| Octahedral Distortion                                                            | $\Delta d$            |
|----------------------------------------------------------------------------------|-----------------------|
| ( <i>R</i> -APD)PbBr <sub>4</sub>                                                | $2.05 \times 10^{-3}$ |
| ( <i>S</i> -APD)PbBr <sub>4</sub>                                                | $1.86 \times 10^{-3}$ |
| (1 <i>R</i> ,2 <i>R</i> -DACH) <sub>2</sub> PbBr <sub>6</sub> ·2H <sub>2</sub> O | $1.4 \times 10^{-4}$  |
| (1 <i>S</i> ,2 <i>S</i> -DACH) <sub>2</sub> PbBr <sub>6</sub> ·2H <sub>2</sub> O | $1.34 \times 10^{-4}$ |

**Table S6.** Comparison of LDT of chiral metal halides in literatures and this work.

|                                                                                | Pulse width/ fs | Repetition rate/ MHz | Laser spot diameter / $\mu\text{m}$ | Power/ mW | Power intensity $\text{mJ}/\text{cm}^2$ | LDT $\text{GW}/\text{cm}^2$ | Ref.             |
|--------------------------------------------------------------------------------|-----------------|----------------------|-------------------------------------|-----------|-----------------------------------------|-----------------------------|------------------|
| $(R\text{-MPEA})_{1.5}\text{PbBr}_{3.5}(\text{DMSO})_{0.5}$ nanowires          | 100             | 82                   | 10                                  | 67.5      | 0.52                                    | 5.2                         | 1                |
| $(S\text{-}2\text{-C}_5\text{H}_{14}\text{N}_2)_2\text{PbI}_6$ single crystals | 100             | 80                   | 20                                  | 745       | 2.97                                    | 29.66                       | 2                |
| $(S\text{-}2\text{-MPD})\text{PbBr}_3$ single crystals                         | 100             | 80                   | 20                                  | 714       | 2.84                                    | 28.42                       | 3                |
| $(R\text{-MBA})\text{CuBr}_2$ microflakes                                      | 100             | 82                   | -                                   | -         | 1.7                                     | 17                          | 4                |
| $(R\text{-MBA})_2\text{CuCl}_4$ microplates                                    | 100             | 82                   | -                                   | -         | 0.4                                     | 4                           | 4                |
| $\text{DMA}_4\text{BiBr}_7$                                                    | 100             | 80                   | 20                                  | 563       | 2.23                                    | 22.3                        | 5                |
| $(R\text{-}2\text{-MP})\text{ZnCl}_4$                                          | 100             | 80                   | 20                                  | 575       | 2.29                                    | 22.89                       | 6                |
| $(S\text{-CIMBA})_2\text{SnCl}_6$                                              | 100             | 80                   | 20                                  | 615       | 2.45                                    | 24.48                       | 7                |
| $(S\text{-FMBA})_2\text{SnCl}_6$                                               | 100             | 80                   | 20                                  | 1000      | 3.98                                    | 39.81                       | 7                |
| $(R\text{-NEA})_2\text{CuCl}_4$ films                                          | 100             | 80                   | -                                   | -         | 0.56                                    | 5.6                         | 8                |
| $(R\text{-CYHEA})_6\text{Cu}_3\text{Cl}_{12}$ films                            | 100             | 80                   | -                                   | -         | 0.52                                    | 5.2                         | 8                |
| $(R\text{-MPEA})_6\text{InCl}_9$                                               | 100             | 80                   | 20                                  | 961       | 3.82                                    | 38.26                       | 9                |
| $\text{DMA}_4[\text{InCl}_6]\text{Br}$                                         | 100             | 80                   | 20                                  | 800       | 3.18                                    | 31.85                       | 10               |
| $R\text{-}2\text{-mpip}[\text{SnBr}_3]\text{Br}$                               | 100             | 80                   | 20                                  | 438       | 1.74                                    | 17.44                       | 11               |
| $R\text{-}2\text{-mpipSnBr}_6$                                                 | 100             | 80                   | 20                                  | 1185      | 4.72                                    | 47.17                       | 11               |
| $(R\text{-}3\text{-aminopiperidine})\text{SbCl}_5$                             | 100             | 80                   | 20                                  | 961       | 3.94                                    | 39.4                        | 12               |
| $(R\text{-}3\text{-aminopiperidine})\text{SbBr}_5$                             | 100             | 80                   | 20                                  | 350       | 1.39                                    | 13.93                       | 12               |
| $(\text{MPEA})_2\text{SnBr}_6$                                                 | 100             | 80                   | 20                                  | 420       | 1.67                                    | 16.72                       | 13               |
| $(\text{C}_4\text{H}_{10}\text{NO})\text{PbCl}_3$                              | 140             | 80                   | 2                                   | -         | -                                       | 19.94                       | 14               |
| $(\text{C}_4\text{H}_{10}\text{NO})\text{PbBr}_3$                              | 140             | 80                   | 2                                   | -         | -                                       | 46.82                       | 14               |
| $(S\text{-NEA})_3\text{Ge}_2\text{I}_7 \cdot \text{H}_2\text{O}$               | 100             | 80                   | 6                                   | -         | -                                       | 38.46                       | 15               |
| $(R\text{-MBA})_2\text{CuCl}_4$ film                                           | 100             | 80                   | 20                                  | -         | -                                       | 3.31                        | 16               |
| $(\text{L-Pro})\text{PbI}_3 \cdot \text{H}_2\text{O}$                          | 100             | 80                   | 20                                  | 700       | 2.8                                     | 27.87                       | 17               |
| $(1S,2S\text{-DACH})_2\text{PbBr}_6 \cdot 2\text{H}_2\text{O}$                 | 100             | 80                   | 20                                  | 1362      | 5.42                                    | 54.22                       | <b>This work</b> |
| $(S\text{-APD})\text{PbBr}_4$                                                  | 100             | 80                   | 20                                  | 1491      | 5.94                                    | 59.36                       | <b>This work</b> |

$$Power_{intensity} = \frac{P}{f\pi r^2}$$

$$LDT = \frac{P}{f\pi r^2 t}$$

The laser-induced damage threshold (LDT) was defined as  $LDT = P/(F \times \pi r^2 t)$ , where P, denoted incident power when the SHG signal is offset from the square dependence, F, r and t are frequency and radius of laser spot, pulse width, respectively.

**Table S7.** Comparison of  $g_{\text{SHG-CD}}$  in the literature and this work.

| Chiral compounds                                                                 | Morphology          | Laser conditions              | Anisotropic g factor       | Ref       |
|----------------------------------------------------------------------------------|---------------------|-------------------------------|----------------------------|-----------|
| [( <i>R/S</i> )-3-aminopiperidine]PbI <sub>4</sub>                               | single crystal      | 1064 nm, pulse power of 400mV | $g_{\text{SHG-CD}} = 0.21$ | 18        |
| ( <i>R</i> -MBA) <sub>4</sub> Bi <sub>2</sub> Br <sub>10</sub>                   | spiral microplates. | 1200 nm, 100 fs, 1 kHz        | $g_{\text{SHG-CD}} = 0.58$ | 19        |
| ( <i>R</i> -MBACl) <sub>2</sub> PbI <sub>4</sub>                                 | thin film           | 880 nm, 100 fs, 80MHz         | $g_{\text{SHG-CD}} = 1.57$ | 20        |
| <i>P</i> -DMA <sub>4</sub> [InCl <sub>6</sub> ]Br                                | single crystal      | 1040 nm, 100 fs, 80 MHz       | $g_{\text{SHG-CD}} = 1.56$ | 10        |
| ( <i>R</i> -1-(1-NEA) <sub>2</sub> CuCl <sub>4</sub>                             | thin film           | 880 nm, 100 fs, 80 MHz        | $g_{\text{SHG-CD}} = 0.41$ | 21        |
| ( <i>R</i> -1-(2-NEA) <sub>2</sub> CuCl <sub>4</sub>                             | thin film           | 880 nm, 100 fs, 80 MHz        | $g_{\text{SHG-CD}} = 0.1$  | 21        |
| ( <i>R/S</i> -MPEA)BAPbBr <sub>4</sub>                                           | thin film           | 800 nm, 100 fs, 80 MHz        | $g_{\text{SHG-CD}} = 0.8$  | 22        |
| ( <i>R</i> -NEA) <sub>3</sub> Ge <sub>2</sub> I <sub>7</sub> ·H <sub>2</sub> O   | single crystal      | 880 nm, 100 fs, 80 MHz        | $g_{\text{SHG-CD}} = 0.48$ | 15        |
| ( <i>S</i> -NEA) <sub>3</sub> Ge <sub>2</sub> I <sub>7</sub> ·H <sub>2</sub> O   | single crystal      | 880 nm, 100 fs, 80 MHz        | $g_{\text{SHG-CD}} = 0.45$ | 15        |
| (1 <i>S</i> ,2 <i>S</i> -DACH) <sub>2</sub> PbBr <sub>6</sub> ·2H <sub>2</sub> O | single crystal      | 1040 nm, 100 fs, 80 MHz       | $g_{\text{SHG-CD}} = 1.58$ | This work |
| ( <i>S</i> -APD)PbBr <sub>4</sub>                                                | single crystal      | 1040 nm, 100 fs, 80 MHz       | $g_{\text{SHG-CD}} = 0.60$ | This work |

$$g_{\text{SHG-CD}} = 2 \frac{I_{\text{LCP}} - I_{\text{RCP}}}{I_{\text{LCP}} + I_{\text{RCP}}}$$

where  $I_{\text{LCP}}$  and  $I_{\text{RCP}}$  represent the SHG intensities under LCP and RCP light excitation, respectively.

### 3. References

1. Yuan, C.; Li, X.; Semin, S.; Feng, Y.; Rasing, T.; Xu, J., Chiral Lead Halide Perovskite Nanowires for Second-Order Nonlinear Optics. *Nano Lett.* **2018**, *18* (9), 5411-5417.
2. Jia, X.; Zheng, Y.; Cheng, P.; Han, X.; Xu, L.; Xu, J., Methylpiperazine based 0D chiral hybrid lead halides for second harmonic generation. *Dalton Trans.* **2022**, *51* (18), 7248-7254.
3. Zheng, Y.; Xu, J.; Bu, X. H., 1D Chiral Lead Halide Perovskites with Superior Second-Order Optical Nonlinearity. *Adv. Opt. Mater.* **2022**, *10* (1), 2101545.
4. Ge, F.; Li, B. H.; Cheng, P.; Li, G.; Ren, Z.; Xu, J.; Bu, X. H., Chiral Hybrid Copper(I) Halides for High Efficiency Second Harmonic Generation with a Broadband Transparency Window. *Angew. Chem. Int. Ed.* **2022**, *61* (10), e202115024.
5. Zheng, Y.; Han, X.; Cheng, P.; Jia, X.; Xu, J.; Bu, X. H., Induction of Chiral Hybrid Metal Halides from Achiral Building Blocks. *J. Am. Chem. Soc.* **2022**, *144* (36), 16471-16479.
6. Han, X.; Cheng, P.; Han, W.; Shi, R.; Guan, J.; Li, G.; Xu, J., Circularly polarized luminescence and nonlinear optical harmonic generation based on chiral zinc halides. *Chem. Commun.* **2023**, *59* (48), 7447-7450.
7. Han, X.; Cheng, P.; Shi, R.; Zheng, Y.; Qi, S.; Xu, J.; Bu, X. H., Linear optical afterglow and nonlinear optical harmonic generation from chiral tin(IV) halides: the role of lattice distortions. *Mater. Horiz.* **2023**, *10* (3), 1005-1011.
8. Li, B.; Yu, Y.; Xin, M.; Xu, J.; Zhao, T.; Kang, H.; Xing, G.; Zhao, P.; Zhang, T.; Jiang, S., Second-order nonlinear optical properties of copper-based hybrid organic-inorganic



- perovskites induced by chiral amines. *Nanoscale* **2023**, *15* (4), 1595-1601.
9. Qi, S.; Ge, F.; Han, X.; Cheng, P.; Shi, R.; Liu, C.; Zheng, Y.; Xin, M.; Xu, J., 0D chiral hybrid indium(III) halides for second harmonic generation. *Dalton Trans.* **2022**, *51* (22), 8593-8599.
10. Guan, J. J.; Zheng, Y. S.; Cheng, P. X.; Han, W. Q.; Han, X.; Wang, P. H.; Xin, M. Y.; Shi, R. C.; Xu, J. L.; Bu, X. H., Free Halogen Substitution of Chiral Hybrid Metal Halides for Activating the Linear and Nonlinear Chiroptical Properties. *J. Am. Chem. Soc.* **2023**, *145* (49), 26833-26842.
11. Yu, B. Y.; Han, W. Q.; Liu, G. K.; Wei, Y. Y.; Wei, J.; Zheng, Y. S.; Dang, Y. Y., Oxidation-Induced Dissolution Recrystallization Structural Transformation Strategy Enhanced Nonlinear Optical Effect of Hybrid Chiral Tin Bromide Single Crystals. *Inorg. Chem.* **2023**, *62* (49), 20520-20527.
12. Qi, S.; Cheng, P.; Han, X.; Ge, F.; Shi, R.; Xu, L.; Li, G.; Xu, J., Organic-Inorganic Hybrid Antimony(III) Halides for Second Harmonic Generation. *Cryst. Growth Des.* **2022**, *22* (11), 6545-6553.
13. Zhao, L.; Han, X.; Zheng, Y.; Yu, M.-H.; Xu, J., Tin-Based Chiral Perovskites with Second-Order Nonlinear Optical Properties. *Adv. Photon. Res.* **2021**, *2* (11), 2100056.
14. Shen, C.; Sun, D.; Dang, Y.; Wu, K.; Xu, T.; Hou, R.; Chen, H.; Wang, J.; Wang, D., (C<sub>4</sub>H<sub>10</sub>NO)PbX<sub>3</sub> (X = Cl, Br): Design of Two Lead Halide Perovskite Crystals with Moderate Nonlinear Optical Properties. *Inorg. Chem.* **2022**, *61* (42), 16936-16943.
15. Wang, H.; Li, J.; Lu, H.; Gull, S.; Shao, T.; Zhang, Y.; He, T.; Chen, Y.; He, T.; Long, G., Chiral Hybrid Germanium(II) Halide with Strong Nonlinear Chiroptical Properties.

*Angew. Chem. Int. Ed.* **2023**, *62* (41), e202309600.

16. Guo, Z.; Li, J.; Wang, C.; Liu, R.; Liang, J.; Gao, Y.; Cheng, J.; Zhang, W.; Zhu, X.; Pan, R.; He, T., Giant Optical Activity and Second Harmonic Generation in 2D Hybrid Copper Halides. *Angew. Chem. Int. Ed.* **2021**, *60* (15), 8441-8445.

17. Xin, M.; Cheng, P.; Han, X.; Shi, R.; Zheng, Y.; Guan, J.; Chen, H.; Wang, C.; Liu, Y.; Xu, J.; Bu, X. H., Resonant Second Harmonic Generation in Proline Hybrid Lead Halide Perovskites. *Adv. Opt. Mater.* **2023**, *11*, 2202700.

18. Fu, D.; Xin, J.; He, Y.; Wu, S.; Zhang, X.; Zhang, X. M.; Luo, J., Chirality-Dependent Second-Order Nonlinear Optical Effect in 1D Organic-Inorganic Hybrid Perovskite Bulk Single Crystal. *Angew. Chem. Int. Ed.* **2021**, *60* (36), 20021-20026.

19. Fu, X. W.; Zeng, Z. X. S.; Jiao, S. L.; Wang, X. X.; Wang, J. X.; Jiang, Y.; Zheng, W. H.; Zhang, D. L.; Tian, Z. H.; Li, Q. Y.; Pan, A. L., Highly Anisotropic Second-Order Nonlinear Optical Effects in the Chiral Lead-Free Perovskite Spiral Microplates. *Nano Lett.* **2023**, *23* (2), 606-613.

20. Okada, D.; Araoka, F., Magneto-chiral Nonlinear Optical Effect with Large Anisotropic Response in Two-Dimensional Halide Perovskite. *Angew. Chem. Int. Ed.* **2024**, *63* (21), e202402081.

21. Guo, Z.; Li, J.; Liang, J.; Wang, C.; Zhu, X.; He, T., Regulating Optical Activity and Anisotropic Second-Harmonic Generation in Zero-Dimensional Hybrid Copper Halides. *Nano Lett.* **2022**, *22* (2), 846-852.

22. Guo, Z. H.; Li, J. Z.; Liu, R. L.; Yang, Y.; Wang, C. S.; Zhu, X.; He, T. C., Spatially Correlated Chirality in Chiral Two-Dimensional Perovskites Revealed by Second-

Harmonic-Generation Circular Dichroism Microscopy. *Nano Lett.* **2023**, *23*, 7434.
